# Supplementary material for: Entrega de Cartas Credenciales en Londres y Washington
Source: Hindawi journal article supplement (doi:10.1155/2019/9804584), 2000-01-01
Supplement: f1 [file 9804584.f1.pdf]

1 **SUPPLEMENTARY INFORMATION**

2

3 **SUPPLEMENTAL FIGURES AND TABLES:**

4

5

6

7 **Supplemental Figure 1:**

8

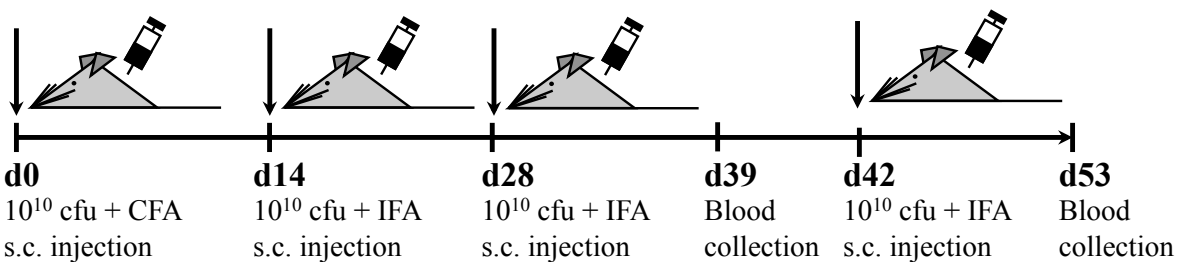

9

10 **Supplemental Figure 1: Mice immunization protocol with Mim\_F8-1 phagotope.**

11 Four BALB/c mice were injected subcutaneously with heat-inactivated Mim\_F8-1  
12 phagotope (10<sup>10</sup> cfu) at day 0 in complete Freund's adjuvant (CFA) and at days 14, 28  
13 and 42 in incomplete Freund's adjuvant (IFA). Serum was collected at days 39 and 53  
14 and tested for their reactivity as described in Figure 5.

## 1 Supplemental Figure 2:

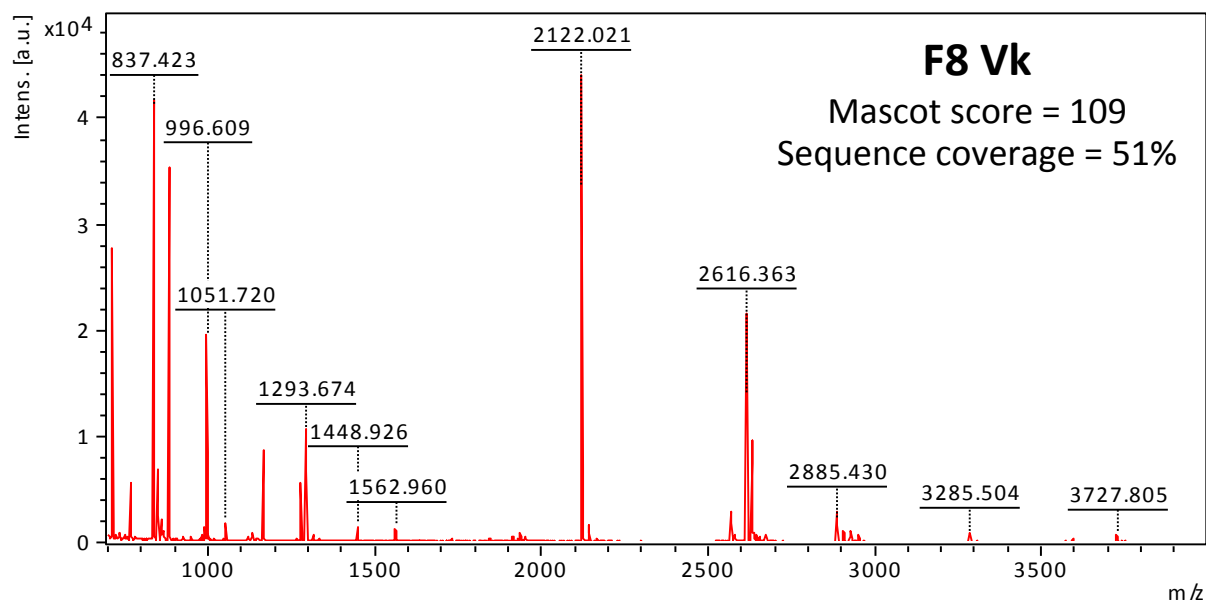

1 MKLPVRLVL MFWIPASSSD VLMTQTPLSL PVSLGDKVSI SCR**SSQSI**VH  
51 **SDGNI**LEWS **LQKPGQ**SPKL IY**KVSN**RFFG VPDRFSGSGS GTDFTLKISR  
101 **VEAEDL**GVYY **CFQGS**HFPYT **FGGGT**KLELK RADAAPT**VS**I FPPS**SEQL**TS  
151 **GGASV**CFLN **NFY**PKDINVK **WKIDG**SERQN GVLNSWTDQD SKDSTYSMSS  
201 TLLTLTKDEYE RHNSYTCEAT HKTSTSPIVK SFNRNEC

2  
3 **Supplemental Figure 2: Sequence analysis of the F8 mAb by mass spectrometry.**  
4 Identification of the light chain of the F8 antibody was made by MALDI-TOF PMF  
5 (peptide mass fingerprint). Spectra was obtained in positive reflector mode on an  
6 Autoflex speed IV (Bruker) in the mass range 700-4000 m/z using CHCA matrix.  
7 Identified peptides are shown in bold red in the sequence and CDRs of Vκ are  
8 highlighted in yellow.

1 **Supplemental Figure 3:**

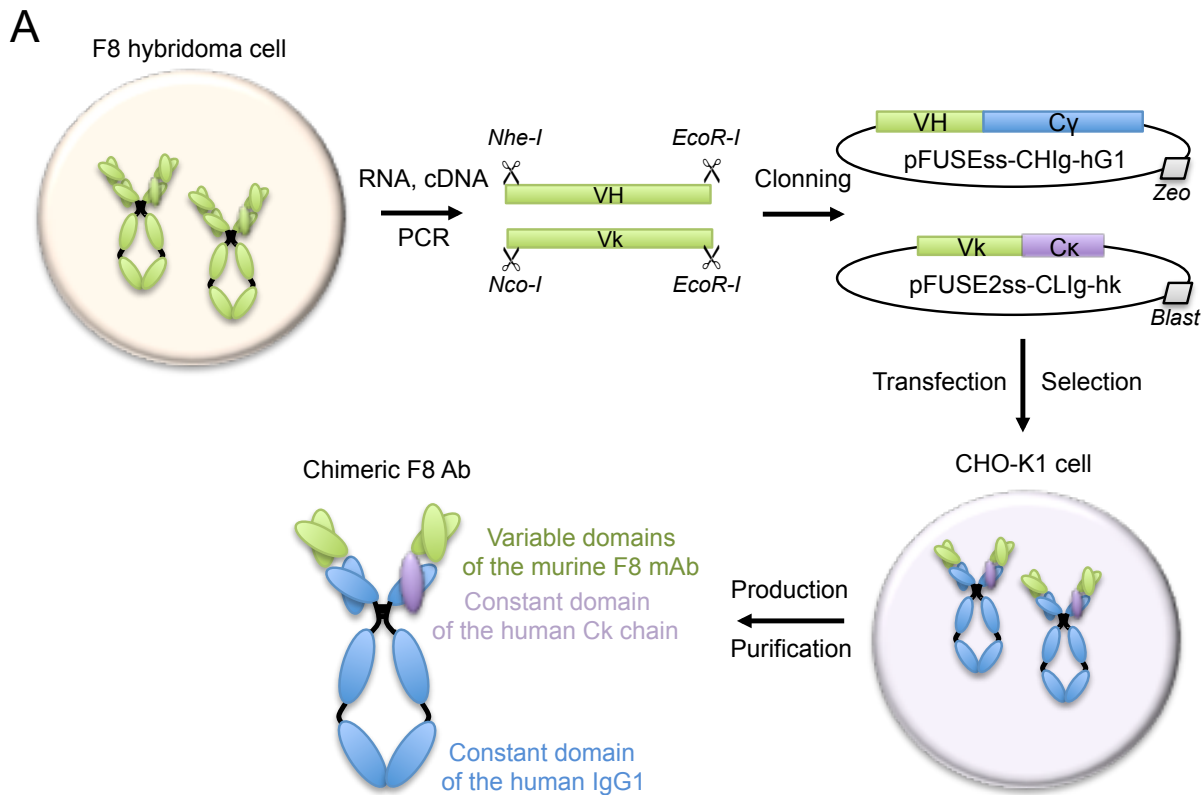

**B**

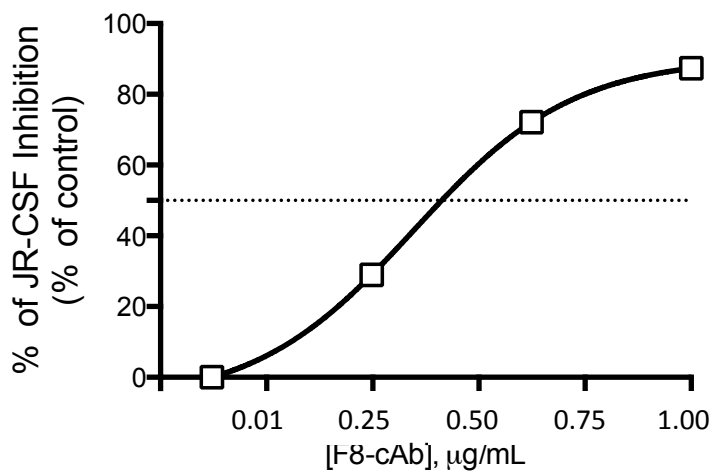

1 **Supplemental Figure 3: Construction and characterization of the chimeric F8 mAb.**  
2 (A) cDNA was synthesized after RNA extraction from F8 hybridoma. VH and VL domains  
3 were amplified by PCR with oligonucleotides coding for the indicated restriction sites.  
4 The DNA fragments were cloned into plasmids coding for the corresponding human  
5 constant IgG1 and k domains. CHO cells were co-transfected with the plasmids and  
6 selected with zeocin (zeo) and blasticidin (blast). The chimeric F8 mAb was purified  
7 using protein A agarose beads as mentioned in Supplemental information. (B)  
8 Neutralizing activity of HIV infection was performed as mentioned in Figure 2 using the  
9 JR-CSF strain and different concentrations of purified chimeric F8 mAb (F8-cAb). The  
10 calculated IC50 was 0.3 µg/mL.

1 **Supplemental Figure 4:**

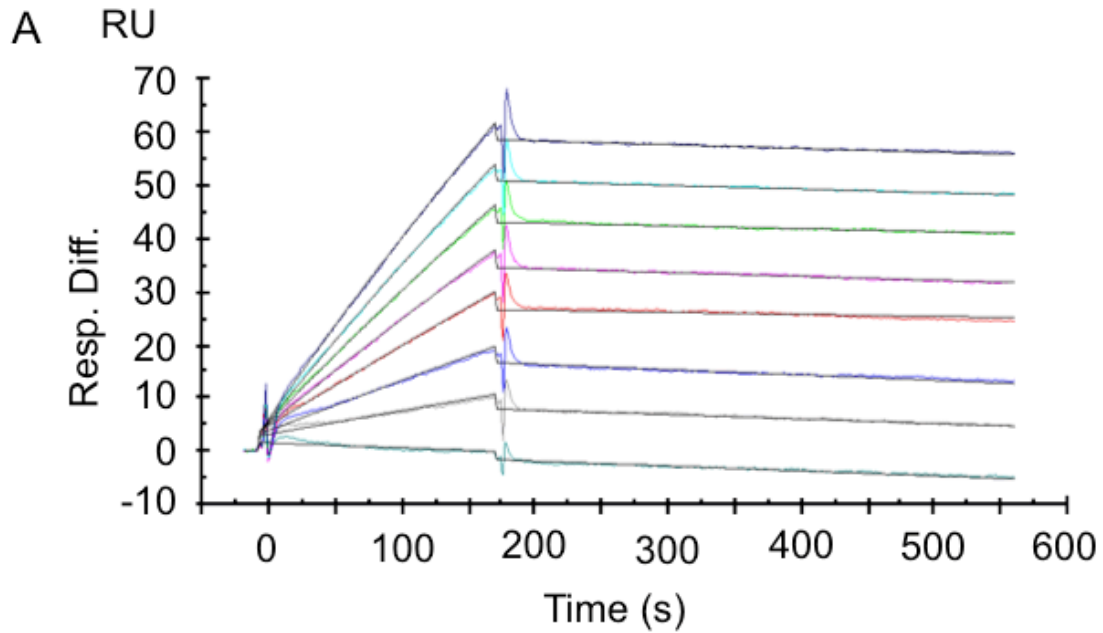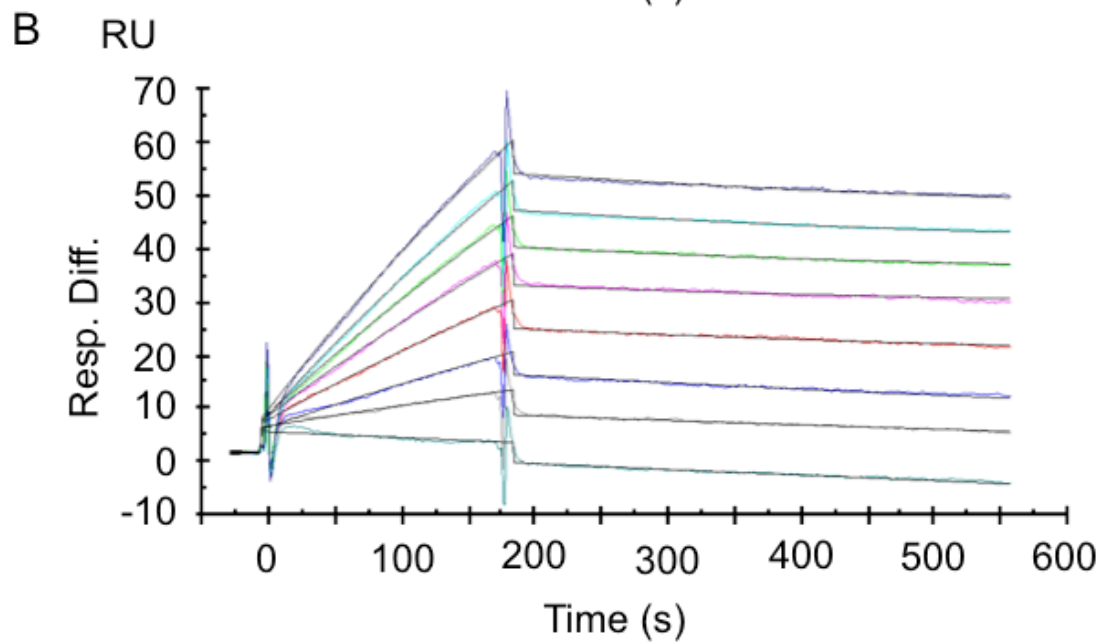

**C**

|                     | <b>kon (1/Ms)</b> | <b>koff (1/s)</b> | <b>KD (M)</b> |
|---------------------|-------------------|-------------------|---------------|
| <b>BSA-W614A-3S</b> | 4.10e5            | 1.09e-6           | 2,65e-12      |
| <b>BSA-3S</b>       | 8.06e5            | 8.11e-4           | 1.01e-9       |

1 **Supplemental Figure 4: SPR sensorgrams of F8 mAb binding to BSA-W614S-3S**  
2 **and BSA-3S.** The resonance signal in RU is given as the response difference (Resp.  
3 Diff.) between the reference cell (without immobilized ligand) and the sample cell. The  
4 F8 mAb was immobilized onto a CM5 sensor chip (as mentioned in Supplemental  
5 methods) and the analytes were injected at concentrations of 2.8, 2.4, 2, 1.6, 1.2, 0.8,  
6 0.4 nM for BSA-W614A-3S (**A**) and 1.4, 1.2, 1, 0.8, 0.6, 0.4, 0.2 nM for BSA-3S (**B**).  
7 Binding rate constants and apparent affinities of BSA-3S and BSA-W614A-3S for the F8  
8 mAb in SPR are shown in **C**.

1 **Supplemental Table I: Molecular characterization of the anti-W614A-3S mAbs.**

|            |                          | <b>B8 / G9</b>                   | <b>F8 / C9</b>                       | <b>G6</b>                        |
|------------|--------------------------|----------------------------------|--------------------------------------|----------------------------------|
| <b>IGH</b> | <b>V-gene and allele</b> | IGHV5-4*02<br>96% (276/288 nt)   | IGHV3-6*01 or 02<br>93% (267/285 nt) | IGHV1-26*01<br>99% (268/271 nt)  |
|            | <b>J-Gene and allele</b> | IGHJ3*01<br>100% (48/48 nt)      | IGHJ2*01<br>83% (40/48 nt)           | IGHJ2*01<br>90% (43/48 nt)       |
|            | <b>D-Gene and allele</b> | IGHD1-1*01                       | IGHD2-2*01                           | IGHD2-12*01                      |
|            | <b>CDR3 length</b>       | 11                               | 5                                    | 10                               |
|            | <b>CDR3 MW</b>           | 1,752.93                         | 911.01                               | 1,417.48                         |
|            | <b>CDR3 sequence</b>     | CTRDRDFSWFAYW                    | CYGYGYW                              | CARGNFGNDDYW                     |
| <b>IGK</b> | <b>V-gene and allele</b> | IGKV1-117*01<br>99% (291/294 nt) | IGKV1-117*01<br>96% (283/294 nt)     | IGKV1-117*01<br>98% (289/294 nt) |
|            | <b>J-Gene and allele</b> | IGKJ5*01<br>95% (36/38 nt)       | IGKJ2*01<br>84% (32/38 nt)           | IGKJ5*01<br>100% (36/36 nt)      |
|            | <b>CDR3 length</b>       | 9                                | 9                                    | 9                                |
|            | <b>CDR3 MW</b>           | 1,235.43                         | 1,333.49                             | 1,235.43                         |
|            | <b>CDR3 sequence</b>     | CFQGSHVPLTF                      | CFQGSHFPYTF                          | CFQGSHVPLTF                      |

1 **Supplemental Table II: Sequence of the peptides used in this study**

2

3 3S-SCR: C W D A L N D W S P S K I A S N

4

5 3S: C P W N **W** S A S N K S L D D I W

6 W614A-3S: C P W N **A** S A S N K S L D D I W

7

8 Mim\_F8-1: D L F Y **E C A G C** K

9 Mim\_F8-2: **E C A G C** A V D S L

10



## 1 SUPPLEMENTAL MATERIAL AND METHODS:

### 3 Peptides Synthesis

4 The peptides described in the Supplemental Table II were synthesized by CovalAb  
5 (Villeurbanne, France) using solid-phase Fmoc chemistry with >80% purity levels. The  
6 biotinylated Mim\_F8-1 peptide (DLFYECAGCK-Biot) was synthesized via Fmoc  
7 chemistry using the Liberty Blue™ automated microwave peptide synthesizer (CEM  
8 Corporation), a Biotin NovaTag (Merck Millipore), and a systematic double-coupling  
9 protocol. The peptide was cleaved from the resin and deprotected using standard TFA  
10 procedures with 1,2-ethanedithiol, water, and triisopropylsilane as scavengers. The  
11 peptide was purified by reverse-phase high-performance liquid chromatography (RP-  
12 HPLC) using a Phenomenex Luna® C18(2) semi-preparative column (5 μm, 250 × 10  
13 mm) and lyophilized. Pure peptide was dissolved with water/DMSO (2/1) and incubated  
14 at room temperature for 16h. The oxidized reaction mixture was purified directly by RP-  
15 HPLC and lyophilized. The homogeneity and identity of the synthetic peptide were  
16 assessed by MALDI-TOF mass spectrometry (Voyager DE-PRO Applied Biosystems)  
17 and analytical RP-HPLC (Grace Apollo C18 column, 5 μm, 250 x 4.6 mm).

### 19 Molecular characterization of mAbs

20 RNA was extracted from 10<sup>6</sup> hybridoma cells with Trizol reagent (Thermo Scientific,  
21 Ambion), and reverse transcription done using the Reverse Transcriptase Core kit  
22 (Eurogentec) according to manufacturer's instructions. The amplification of the IgG  
23 variable domains was performed as previously reported (1). DNA sequencing of purified

1 amplicons was performed on an ABI Prism 3700 automatic sequencer (Thermo  
2 Scientific, Applied Biosystems) using the BigDye Terminator v1.1 Cycle Sequencing Kit  
3 and analyzed with the Sequencher1v4.7 sequence analysis software (Gene Codes  
4 Corporation). Identification of V, D, J genes and alleles of Ig was performed with  
5 IMGT/V-QUEST program version: 3.3.5 (2, 3).

6

### 7 **mAb chimerization**

8 The IgG variable domains were amplified by PCR using the FastStart High Fidelity PCR  
9 System (Roche) from the cDNA of the F8 hybridoma using specific PAGE-purified  
10 oligonucleotides (Eurogentec). The VH and the VL domains were cloned into the  
11 pFUSEss-CHIg-hG1 and pFUSE2ss-CLIg-hk respectively (both from Invivogen) using  
12 the In-Fusion HD Cloning Kit (Takara Bio) according to the manufacturer instructions.  
13 After cloning, isolated colonies were screened by PCR and sequenced to check the  
14 integrity of the murine variable domains and the in-frame junction with the sequence of  
15 the human Ig constant domains.

16 CHO-K1 cells were co-transfected with the pFUSEss-**F8VH**-CHIg-hG1 and pFUSE2ss-  
17 **F8Vk**-CLIg-hk at a 2:3 ratio using JetPrime transfection reagent (Polyplus-Transfection)  
18 and selected with blasticidin (100 µg/mL) and zeocin (25 µg/mL) (both from Invivogene).  
19 Resistant cells were subcloned by limiting dilution in 96-well plates and supernatants  
20 were analyzed for chimeric antibody expression by indirect ELISA. One of the positive  
21 clones was culture expanded into DMEM supplemented with 2.5% of Ultra Low IgG  
22 Fetal Bovine Serum (Thermo Scientific, Gibco) and the chimeric antibody was purified  
23 from 100 mL supernatant using protein A agarose beads (Calbiochem).

1

## 2 **Antibody binding assays and KD determination**

3 Kinetics and affinity of the F8 antibody binding was analyzed by Surface Plasmon  
4 Resonance (SPR) on a Biacore 3000 instrument (GE Healthcare) using a CM5 sensor  
5 chip in order to obtain 1500 RU of covalently coupled protein essentially as described in  
6 (4). All experiments were performed in triplicate. The purified F8 mAb was immobilized  
7 at 30  $\mu\text{g}/\text{mL}$  following by injection of 1M ethanolamine hydrochloride. Kinetic  
8 experiments were carried out in running buffer by passing various concentrations of the  
9 analyte over the ligand surface with a 3-min association phase and a 6-min dissociation  
10 phase. The sensor surface was regenerated between each cycle with 10 mM glycine  
11 hydrochloride (pH 2.5). The BSA-3S-scr was used as negative control and identical  
12 injections over blank surfaces were subtracted from all experiments. Kinetics were  
13 evaluated by using the BIAevaluation software, Version 4.1 (GE Healthcare). The data  
14 were processed by fitting the binding profiles to a 1:1 Langmuir interaction model. The  
15 quality of the fit was assessed by the statistical  $\chi^2$  value provided by the software. The  
16 fitting of each dataset yielded rates for association ( $k_{on}$ ) and dissociation ( $k_{off}$ ), from  
17 which the equilibrium dissociation constant  $K_D$  was calculated ( $K_D = k_{on}/k_{off}$ ). The  $k_{on}$ ,  
18  $k_{off}$  and  $K_D$  from 3 experiments were used to calculate the mean values of these  
19 variables.

20 Biolayer interferometry (BLI) analyses were run on a BLItz instrument (ForteBio, Inc.).  
21 Streptavidin (SA) and anti-mouse IgG Fc Capture (AMC) biosensors were used to  
22 immobilize biotin-conjugated Mim\_F8-1 peptide and mAbs, respectively, before to be  
23 dipped into solution of analytes diluted in kinetics buffer. Results were analyzed using

- 1 the BLItz Pro software (version 1.2.1.3), resulting in estimation of association and
- 2 dissociation rates.

1   **REFERENCES**

2

3   1.    Dorgham K, Dejou C, Piesse C, Gorochov G, Pene J, Yssel H. 2016. Identification of the  
4        Single Immunodominant Region of the Native Human CC Chemokine Receptor 6  
5        Recognized by Mouse Monoclonal Antibodies. Plos One 11.

6   2.    Brochet X, Lefranc MP, Giudicelli V. 2008. IMGT/V-QUEST: the highly customized and  
7        integrated system for IG and TR standardized V-J and V-D-J sequence analysis. Nucleic  
8        Acids Res 36:W503-8.

9   3.    Giudicelli V, Brochet X, Lefranc MP. 2011. IMGT/V-QUEST: IMGT standardized  
10        analysis of the immunoglobulin (IG) and T cell receptor (TR) nucleotide sequences. Cold  
11        Spring Harb Protoc 2011:695-715.

12  4.    Tudor D, Yu H, Maupetit J, Drillet AS, Bouceba T, Schwartz-Cornil I, Lopalco L,  
13        Tuffery P, Bomsel M. 2012. Isotype modulates epitope specificity, affinity, and antiviral  
14        activities of anti-HIV-1 human broadly neutralizing 2F5 antibody. Proc Natl Acad Sci U  
15        S A 109:12680-5.

16
